# Supplementary material
Source: publisher figshare collection journal article supplement (https://brill.figshare.com/ndownloader/files/13726091)
Supplement: Supplementary file 1 [file 13726091]

**Mogila (Nova Huta, Poland)**

**Biblioteka O.O.Cystersów**

**634 xvi (1591-93)**

[Ad Her] cn (? ‘supplementa in 4 libros rhetoricorum Ciceronis ad C Herennium audita sub venerabili Domino magistro Martino Gilievo commutatione aestiva in lectorio Aristotelis, hora XVII, anno Domini 1592 rectoratu … per me Stanislaum Zambek’; see POKk p.603)

add slash to place

**Montpellier (France)**

**Faculté (Bibliothèque Interuniversitaire, section Médécine, École de Médécine) de Médécine**

**213 (Fonds de Bouhier D.25) xi**

De inv

[De inv] m-gl (‘primum in hoc libro notandum quod quicumque incipit’ = abr version of m-gl in MS Oxford Laud lat. 49?)

**Montpellier (France)**

**Faculté de Médécine**

**335 xii**

De inv

[De inv] mi-gl

Ad Her

**Montpellier (France)**

**Faculté de Médécine**

**361 (formerly E.58 Bibliotheca Buheriane 1721) xiii**

De inv

Ad Her

check

**München (Munich)**

**Bayerische Staatsbibliothek**

**Clm 237 xv (1460)**

Ad Her extr

[Ad Her] ex (E) (Marbod)

**München (Munich)**

**Bayerische Staatsbibliothek**

**Clm 289 xv (1463)**

Ad Her

**München (Munich)**

**Bayerische Staatsbibliothek**

**Clm 334 xv (1460)**

Ad Her

[Ad Her] s-gl

De inv

[De inv] s-gl

**München (Munich)**

**Bayerische Staatsbibliothek**

**Clm 378 xv**

[Ad Her] comm (Guarino da Verona; cf. Clm 28,137)

**München (Munich)**

**Bayerische Staatsbibliothek**

**Clm 426 xv (1460)**

Ad Her E

[Ad Her E] s-gl

**München (Munich)**

**Bayerische Staatsbibliothek**

**Clm 454 xv (1460-64)**

[Ad Her] inaug (Guarino da Verona: ‘Guarini Veronensis in rethoricam novam Ciceronis oratio habita, incipit “per hos dies cum orationum illud et prudens et utile preceptum legerem” ‘)

**München (Munich)**

**Bayerische Staatsbibliothek**

**Clm 576 xvi (1521)**

[Ad Her] ta-rhet

[Ad Her] comm (Ulrich Zasius)

**München (Munich)**

**Bayerische Staatsbibliothek**

**Clm 650 xv**

De inv E (incipit only?)

not included in survey ch. 4(a)

**München (Munich)**

**Bayerische Staatsbibliothek**

**Clm 3565 xv**

[De inv] comm E (Grillius)

[De inv] comm (Thierry of Chartres)

[De inv] comm E (Victorinus)

**München (Munich)**

**Bayerische Staatsbibliothek**

**Clm 3603 xv**

Ad Her

**München (Munich)**

**Bayerische Staatsbibliothek**

**Clm 3941 xv**

Ad Her extr (‘de coloribus rhetoricis ex Tullii nova rhetorica’)

**München (Munich)**

# Bayerische Staatsbibliothek

**Clm 4148 xv**

Ad Her

[Ad Her] s-gl

**München (Munich)**

**Bayerische Staatsbibliothek**

**Clm 4621-II xi**

De inv extr (with Notker Labeo ‘Dialogus de dialectica et rethorica’)

Also contains ‘traité et florilège de rhétorique’ (‘olim disparuit cuius facies depingenda est…’) fols56r-71v; is this to do with or taken from *De inv / Ad Her*? Check.

**München (Munich)**

**Bayerische Staatsbibliothek**

**Clm 6400 (formerly Frisingensis 200) x**

De inv

[De inv] comm (Victorinus)

[De inv] comm E (‘cum sint…’ = MO I #468 p.131)

**München (Munich)**

**Bayerische Staatsbibliothek**

**Clm 6403-I (formerly Frisingensis 203) x (Spallone x-xi)**

[Ad Her] ta (completed in a later h)

Ad Her

[Ad Her] s-gl (**xi-xii**)

check in survey ch. 4(a)

**München (Munich)**

**Bayerische Staatsbibliothek**

**Clm 6405 (formerly Frisingensis 205) xi**

De inv

[De inv] m-gl (cf. Victorinus and Clm 14, 272)

[De inv] ta-rhet

[De inv] comm E (Victorinus)

**München (Munich)**

**Bayerische Staatsbibliothek**

**Clm 6406-I xi**

[De inv] comm E (Grillius)

**München (Munich)**

**Bayerische Staatsbibliothek**

**Clm 6719 (formerly Frisingensis 519) xv**

Ad Her

[Ad Her] mi/s-gl

**München (Munich)**

**Bayerische Staatsbibliothek**

**Clm 6721 (formerly Frisingensis 521) xv**

[Ad Her] comm E (‘quoniam in hoc opere Cicero omnem eius sermonem de arte dicendi…’; dependent upon Guarino and probably Bartolinus)

**München (Munich)**

**Bayerische Staatsbibliothek**

**Clm 7020 (Fürst. 120) xv**

Ad Her incompl

**München (Munich)**

**Bayerische Staatsbibliothek**

**Clm 7881 (Ing. Franc. 11 ) xv**

Ad Her

[Ad Her] s-gl (? ‘Clm 7881 bietet den reinen Text ohne Kommentar. Am Rande befinden sich lediglich einige Anmerkungen, die die Gliederung des Textes betreffen’ – ep. from Hauke 17-10-’86)

**München (Munich)**

**Bayerische Staatsbibliothek**

# Clm 8394 xv

Ad Her incompl

**München (Munich)**

**Bayerische Staatsbibliothek**

**Clm 13,104 xv**

De inv

Ad Her

**München (Munich)**

**Bayerische Staatsbibliothek**

**Clm 14,272-II (Em. C.91) xi**

De inv

[De inv] m/mi-gl (see Clm 6405)

[De inv] ta-rhet

**München (Munich)**

**Bayerische Staatsbibliothek**

**Clm 14,372 (Em.D.97) xi**

[De inv] comm E (? ‘Fragmentum rhetoricorum: “naturali ratione quidem potest repperiri…”, or else an acc to ‘argumentum’ with preliminaries re rhetoric???)’

**München (Munich)**

**Bayerische Staatsbibliothek**

**Clm 14,436-I xi**

Ad Her

[Ad Her] ta-rhet

[Ad Her] s-gl

**München (Munich)**

**Bayerische Staatsbibliothek**

**Clm 14,503 (Em.F.6) xii**

[De inv] ta

De inv

[De inv] s-gl (contemporary and later?)

**München (Munich)**

**Bayerische Staatsbibliothek**

**Clm 14,601-II (Em.G.104) xi**

De inv

Ad Her incompl

[Ad Her] ta

**München (Munich)**

**Bayerische Staatsbibliothek**

**Clm 15,735 xv**

Ad Her

**München (Munich)**

**Bayerische Staatsbibliothek**

**Clm 17,212 (Scheftl. 212) xiii**

Ad Her extr

[Ad Her] ex (E) (Marbod)

**München (Munich)**

**Bayerische Staatsbibliothek**

**Clm 18,802 (Teg. 802) xv (1458)**

Ad Her

[Ad Her] s-gl (Georgius de Puerbach)

**München (Munich)**

**Bayerische Staatsbibliothek**

**Clm 18,961 (Teg. 961) xiii**

[Ad Her] ex (E) (Marbod)

**München (Munich)**

**Bayerische Staatsbibliothek**

**Clm 21,579 xi**

Ad Her E

**München (Munich)**

**Bayerische Staatsbibliothek**

**Clm 22,281-IV xii**

Ad Her E

**München (Munich)**

**Bayerische Staatsbibliothek**

# Clm 23,482-I (formerly ZZ.482) xii

De inv E

[De inv E] s-gl (and **xiii-xiv**)

**München (Munich)**

**Bayerische Staatsbibliothek**

# Clm 23,482-II (formerly ZZ.482) xi

[De inv E] s-gl **(xi-xii** and **xiii-xiv**)

**München (Munich)**

**Bayerische Staatsbibliothek**

# Clm 23,716 (formerly ZZ.716) xiv (1358)

Ad Her

[Ad Her] m-gl (Philippus de Vicecomitibus da Pisto[r]ia ‘viridarium super nova rethorica Tulliana …’)

**München (Munich)**

**Bayerische Staatsbibliothek**

# Clm 24,501 xv (1448)

Ad Her

[Ad Her] s-gl

**München (Munich)**

**Bayerische Staatsbibliothek**

# Clm 24,502 xv

Ad Her

**München (Munich)**

**Bayerische Staatsbibliothek**

# Clm 27,724 xvi (1569)

[Ad Her] comm (‘Brevis et succincta explicatio librorum M.T.Ciceronis ad C.Herennium a perdocto M.Valentino Rotmaro tradita praeceptore meo observando a me vero Georg. Prunnero in hunc modum descripta anno 1569 domini prolegomena..’)

**München (Munich)**

**Bayerische Staatsbibliothek**

# Clm 28,137 xv

[Ad Her] comm (Guarino da Verona)

[Ad Her] cn (a digest of rhetorical doctrine taken from the Ad Her)

**München (Munich)**

**Bayerische Staatsbibliothek**

# Clm 28,362 xv (1464)

Ad Her

[Ad Her] mi/-s-gl

**München (Munich)**

**Bayerische Staatsbibliothek**

# Clm 28,643 xv

[Ad Her] comm E

**München (Munich)**

**Bayerische Staatsbibliothek**

# Clm 28,902 xv

Ad Her E

**München (Munich)**

**Bayerische Staatsbibliothek**

# Clm 29, 220 (2 [MO I p.240 says = Clm 29,001, 8 and bb2 xii, from Clm 21, 633; JOW nn say = 29, 001 (5 from Clm 27, 637??]

De inv E

**München (Munich)**

**Bayerische Staatsbibliothek**

# Clm 29, 220 (2 xii

Ad Her extr (nine fragments, each containing two leaves, representing remains from three folios?)

**München (Munich)**

**Bayerische Staatsbibliothek**

# Clm 29, 220 (3 [MO III.2 p.37 says ‘xii-xiii’] xii

De inv E

[De inv E] s-gl

**München (Munich)**

**Bayerische Staatsbibliothek**

# Clm 29, 220 (5 [MO I p.325, formerly 29001, bg] xi

[Ad Her] comm E

**München (Munich)**

**Bayerische Staatsbibliothek**

# Clm 29, 220 (11 [formerly Clm 29001 (7a); MO I p.326] x-xi

[De inv] comm extr (Victorinus)

**München (Munich)**

**Bayerische Staatsbibliothek**

# Clm 29, 220 (12 [MO III.2 p.49, formerly 29001, 6 and 8, prov:19, 421; 19, 452; 19, 472; 19, 479; 19, 481] xi-xii

[De inv] comm extr (*reportationes* of lectures by Manegold)

[Ad Her] comm extr(*reportationes* of lectures by Manegold)

##On this manuscript, see now the article of Bognini (2016*).*

**München (Munich)**

**Bayerische Staatsbibliothek**

# Clm 29, 220 (13 [formerly 29001 (7a); MO III.2 p.49] xi

[De inv] comm E (Victorinus)

**München (Munich)**

**Bayerische Staatsbibliothek**

# Clm 29, 222 (1 [formerly 29001, 9; MO I pp.240-41] xi

Ad Her E

**München (Munich)**

**Bayerische Staatsbibliothek**

# Clm 29, 222 (2 [formerly 29001, 10; MO I pp.241] xi

Ad Her E

**München (Munich)**

**Bayerische Staatsbibliothek**

# Clm 29,222 (3 [formerly 29001, 12; MO I pp.41] xi

Ad Her E

**München (Munich)**

**Bayerische Staatsbibliothek**

# Clm 29, 222 (4 [formerly 29001, 13, prov: Clm 4535; MO I pp.241] xii

Ad Her E

**München (Munich)**

**Bayerische Staatsbibliothek**

# Clm 29, 222 (5 xii

Ad Her E

**München (Munich)**

**Bayerische Staatsbibliothek**

# Clm 29, 222 (6 [formerly 29001, 11; prov: Clm 4584 and 4628; MO I p.241] xii

Ad Her extr

**München (Munich)**

**Bayerische Staatsbibliothek**

# Clm 29, 222 (6 [formerly 29001 bg; prov: Cgm 3972; MO III.2 p.49] xi-xii

[De inv] comm E

[Ad Her] comm E

**München (Munich)**

**Bayerische Staatsbibliothek**

# Clm 29, 222 (7 [formerly Clm 21,579; MO III.2 p.38] xi

Ad Her extr

**München (Munich)**

**Bayerische Staatsbibliothek**

**Cod.ital. 148 xiv** (see Speroni 1994 p.CV n.30; Holloway *Twice-Told Tales* p.516)

[De inv / Ad Her] trans/para ital* (‘La ritoricha vechia di Tullio volgarizata per ser Brunetto Latini de Fierenza et appresso la dita ritoricha nuova di Tullio volgarizzato per Frate Guidoto de Bologna’ – Holloway p.517)

[Ad Her] acc / exord / ta ital*

**München (Munich)**

**Universitätsbibliothek**

**Fragmentum sine numero+ xi (MO I p.326)**

[De inv] comm E (Victorinus)

**München (Munich)**

# Universitätsbibliothek

**294 xvi (1553-55)**

[Ad Her] comm (POK III)

commentary or text?

**München (Munich)**

# Universitätsbibliothek

**8o xv (1449)**

Ad Her

[Ad Her] s-gl

[Ad Her] ta-rhet

**München (Munich)**

**Universitätsbibliothek**

**8o 346 xvi**

[Ad Her] cn (Georgius Raetzenpergerius, ‘scholia’ / ‘annotata’; POK III)

**München (Munich)**

**Universitätsbibliothek**

**2o 671 xv**

Ad Her

[Ad Her] s-gl

**München (Munich)**

**Universitätsbibliothek**

**4o 530 xv**

Ad Her

[Ad Her] mi/s-gl (several hh, scribal and later)

**München (Munich)**

**Universitätsbibliothek**

**4o 814 xv**

Ad Her

[Ad Her] m/mi-sgl (scribal)

# Munich: see München

**Münster**

**Universitätsbibliothek**

**713 (437) xiv (possibly +)**

Ad Her

De inv

# Naples: see Napoli

**Napoli (Naples)**

**Biblioteca Governativa dei Girolamini (Biblioteca Oratoriana)**

**CF 1.L7 (formerly Pil. XI no.XI) xii-xiii**

De inv

[De inv] s-gl (**xii-xv**)

Ad Her

[Ad Her] s-gl (**xii-xv**)

**Napoli (Naples)**

**Biblioteca Governativa dei Girolamini (Biblioteca Oratoriana)**

**CF 2.11 (formerly Pil. XXII no.1) xiv-xv**

Ad Her E (probably an extract on memory: ‘Marci Tullii Ciceronis de memoria artificiosa’)

**Napoli (Naples)**

**Biblioteca Governativa dei Girolamini (Biblioteca Oratoriana)**

**CF 2.12 (formerly Pil. XI no.XL) xv**

Ad Her

[Ad Her] s-gl

**Napoli (Naples)**

**Biblioteca Nazionale Vittorio Emanuele II (Library invoice and order slips say ‘III’)**

**III, XIII.H.44 xv**

[Ad Her] trans/para-ital* (Guidotto / Giamboni: see Speroni [1994] LXVIII—LXX)

**Napoli (Naples)**

**Biblioteca Nazionale Vittorio Emanuele II**

**IV.A.35 xv (1446)**

De inv

[De inv] s-gl

Ad Her

[Ad Her] s-gl

**Napoli (Naples)**

**Biblioteca Nazionale Vittorio Emanuele II**

# IV.A.37 xv

Ad Her incompl

[Ad Her incompl] s-gl

**Napoli (Naples)**

**Biblioteca Nazionale Vittorio Emanuele II**

# IV.A.38 xv

De inv

[De inv] m-gl

Ad Her

[Ad Her] mi/s-gl

**Napoli (Naples)**

**Biblioteca Nazionale Vittorio Emanuele II**

# IV.A.45 xiv

De inv

[De inv] s-gl

Ad Her

[Ad Her] mi/s-gl

**Napoli (Naples)**

**Biblioteca Nazionale Vittorio Emanuele II**

# IV.A.47 xiv

Ad Her

[Ad Her] s-gl

**Napoli (Naples)**

**Biblioteca Nazionale Vittorio Emanuele II**

# IV.A.48 xv (1472)

Ad Her

**Napoli (Naples)**

**Biblioteca Nazionale Vittorio Emanuele II**

# IV.A.50 xii

De inv

[De inv] s-gl

Ad Her

[Ad Her] s-gl

**Napoli (Naples)**

**Biblioteca Nazionale Vittorio Emanuele II**

# IV.A.54 xii

De inv

Ad Her

**Napoli (Naples)**

**Biblioteca Nazionale Vittorio Emanuele II**

# IV.A.55 xv

Ad Her

**Napoli (Naples)**

**Biblioteca Nazionale Vittorio Emanuele II**

# IV.A.56 xv

Ad Her E

[Ad Her E] s-gl

**Napoli (Naples)**

**Biblioteca Nazionale Vittorio Emanuele II**

# IV.A.59 xv

Ad Her

[Ad Her] s-gl

**Napoli (Naples)**

**Biblioteca Nazionale Vittorio Emanuele II**

# IV.A.64 xv

Ad Her

[Ad Her] s-gl

[Ad Her] acc (? ‘Rhetorica est ars apposita assuadendum vel est artificiosa eloquentia …’)

date correct?

**Napoli (Naples)**

**Biblioteca Nazionale Vittorio Emanuele II**

# IV.B.4 bis xv

[De inv] comm (Victorinus)

[De inv] comm E (‘Cum sint …’

[Victorinus comm in De inv] cn

**Napoli (Naples)**

**Biblioteca Nazionale Vittorio Emanuele II**

# IV.B.14 xv

Ad Her

[Ad Her] s-gl

**Napoli (Naples)**

**Biblioteca Nazionale Vittorio Emanuele II**

# IV.E.9 xiv-xv

Ad Her E

[Ad Her E] m-gl (cites ‘legitur secundum Alanum in prologo artis veteris vel libri inventionum .. dicit Alanus in principio rethorice veteris …Alanus super veterem rhetoricam ubi in primo libro insinuatio est exordium dissimulans…’)

[Ad Her] acc

**Napoli (Naples)**

**Biblioteca Nazionale Vittorio Emanuele II**

# IV.F.35 xv-xvi (c.1500)

[Ad Her] acc (Georgius Merula? Arguing against Cicero’s authorship of the Ad Herennium: ‘video inter eruditos nostri seculi homines certari super auctore eorum librorum qui ad Herennium inscripti vulgo habentur ….’)

**Napoli (Naples)**

**Biblioteca Nazionale Vittorio Emanuele II**

# V.B.12-II xii

De inv extr (wrongly titled in a humanist h at top of f.66r ‘ex commentaris Victorini rhetoricis fragmenta’; ON 1986 [1] p.94)

[De inv] comm E (‘si tam agentis..’)

**Napoli (Naples)**

**Biblioteca Nazionale Vittorio Emanuele II**

# V.B.18 xv

# [De inv] comm E (Victorinus)

[De inv] comm E (‘cum sint…’)

**Napoli (Naples)**

**Biblioteca Nazionale Vittorio Emanuele II**

# V.B.19 xiv (1391-95)

# [Victorinus comm in De inv] acc (= life of Victorinus)

# [De inv] comm E (Victorinus)

# [De inv comm E (Victorinus)] s-gl

[De inv] comm E (‘cum sint…’)

De inv extr

**Napoli (Naples)**

**Biblioteca Nazionale Vittorio Emanuele II**

# V.C.13 xv

De inv E (from bk II: ‘hec de verbo ad verbum extracta sunt de primo libro Marcii Tullii Ciceronis rethoricorum quando fui Rome tempore voluntarii exilii [last six words have been crossed out by a later h])

Possibly MS is xiv-xv?

**Napoli (Naples)**

**Biblioteca Nazionale Vittorio Emanuele II**

# V.C.34 xv

[Ad Her E] exord (Barzizza)

**Napoli (Naples)**

**Biblioteca Nazionale Vittorio Emanuele II**

# V.D.6 fols 1-46v

What is this? Needs to be checked, and if anything relevant, added to survey in ch. 4(a)

**Napoli (Naples)**

**Biblioteca Nazionale Vittorio Emanuele II**

# V.D.10 xv

*[De inv] comm* (Petrus Helias ‘sicut ordo nostre doctrina exigit…’)

*[Ad Her] comm* (announced fol.56v in a different [xv?] hand to that of the above item, ‘commentum Alani super rhetorica nova incipit omnium artium doctrina…’, but the text itself, in a different hand, begins ‘[P]lena et perfecta locutio triplici comparatur adminiculo regulari vocum …’, described in a modern or at least a different hand as ‘Alani commentum super rhetorica nova M.T.Ciceronis…’; on the ‘[P]lena et perfecta’ gloss [not, in fact, by ‘Alanus’] see Ward in Murphy Ren. Eloq. pp.132ff)

*[De inv / Ad Her] comm E* (11 lines on fol.188v (in another xv h?) ‘Commentum super vetere et nova rhetorica. Alanus. Sicut ait Quintilianus rhetorica est ars dicendi apposite ad persuadendum, i,.e ars dicitur talia que conveniant et sufficiant ad persuasionem … rhetorica est animorum commotiva sicut grammatica est recte locutionis inquisitiva’

**Napoli (Naples)**

**Biblioteca Nazionale Vittorio Emanuele II**

# V.D.18 xv

[Ad Her] comm (‘Plena et perfecta locutio triplici comparatur …’)

**Napoli (Naples)**

**Biblioteca Nazionale Vittorio Emanuele II**

# V.D.19 xv

[Ad Her] comm (Bartolinus ‘fas non est nec unquam fuit // visis hiis que requiruntur…’)

**Napoli (Naples)**

**Biblioteca Nazionale Vittorio Emanuele II**

# V.D.25 xv

[De inv] comm (Petrus Helias ‘sicut ordo nostre doctrina exigit…’)

**Napoli (Naples)**

**Biblioteca Nazionale Vittorio Emanuele II**

# V.D.29 xvi

*[De inv / Ad Her] cn* (Fulvio Orsini ‘annotationes in Ciceronem’, fols 1-2, nn on variants in these two texts; apparently the ‘annotationes’ were meant as an introduction to an edition of the works of Cicero by J.des Planches, inc ‘noster doctor Hermetes Hermagoras…’)

**Napoli (Naples)**

**Biblioteca Nazionale Vittorio Emanuele II**

# V.D.38 xv

*[Ad Her] comm* (anon, inc. ‘in nomine Ihesu Christi et sue matris Marie. In principio huius libri tria sunt principaliter inquirenda / nam primo Tullius dat intelligere interrogationem Herrenii ut aliquid de rhetorica scriberet, secundo ponit suam intentionem et ideo dividit prohemium in tres partes’)

**Napoli (Naples)**

**Biblioteca Nazionale Vittorio Emanuele II**

# V.D.62 xv

[Ad Her] comm (Bartolinus, ‘Iustinianus Christianissimus…’)

**Napoli (Naples)**

**Biblioteca Nazionale Vittorio Emanuele II**

# V.F.2 xvi

[Ad Her E] cn (‘Collectanea super primum Rhetoricorum ad Herrennium’, inc. ‘tria sunt tempora…’, then tables of contents and blank pages; POK Iter I)

**Napoli (Naples)**

**Biblioteca Nazionale Vittorio Emanuele II**

# VII.G.7 xv

Ad Her E

[Ad Her E] s-gl

**Napoli (Naples)**

**Biblioteca Nazionale Vittorio Emanuele II**

# VIII.A.41 xiv

[Ad Her] extr / para (‘aliqua notanda de re[thoric]a Tullii [Ciceronis], viciosum exordium est…’ – scribal h)

**Napoli**

**Biblioteca Oratoriana: see Biblioteca Governativa dei Girolamini**

**Newhaven (Connecticut, U.S.A.)**

**Yale University Library (Beinecke Rare book and Manuscript Library, Yale University)**

**Marston 8 xiv**

De inv (Alessio only? Mattmann p.180; Gallick p.88)

**Newhaven (Connecticut, U.S.A.)**

**Yale University Library (Beinecke Rare book and Manuscript Library, Yale University)**

**Marston 30 xv**

[Ad Her] trans/para-ital* ('Ad Her volgarizzamento': Speroni 'Intorno' p.25 n.2)

**Newhaven (Connecticut, U.S.A.)**

**Yale University Library (Beinecke Rare book and Manuscript Library, Yale University)**

**Marston 86 xii**

[De inv] comm (Victorinus)

[De inv] comm E (‘Cum sint …’

is date correct?

**Newhaven (Connecticut, U.S.A.)**

**Yale University Library (Beinecke Rare book and Manuscript Library, Yale University)**

**681 xiv-xv**

Ad Her (see Shailor *Scriptorium* 35 [1981] 95-101; POK *Iter* V)

Glossed? Marston or ‘new acquisitions’?

**New York (U.S.A.)**

**[Columbia University Library (???)]**

**Phillipps 914 xii?** (POK Iter V; Kraus Cat. 153 p.15 no.8; may be one of the MSS listed for Columbia University Library. elsewhere)

De inv

Ad Her

**New York (U.S.A.)**

**[Columbia University Library (???)]**

**Phillipps 915 xiv?** (POK Iter V; Kraus Cat. 153 p.58 no.48)

Ad Her

[Ad Her] s-gl

library? Date? Extent of glosses?

**New York (U.S.A.)**

# Columbia University Library

**Plimpton 102 (formerly Phillipps 117) xv**

Ad Her

**New York (U.S.A.)**

**Columbia University Library**

**Plimpton 103 xi**[De inv] comm (Victorinus)

**New York (U.S.A.)**

**Private Library of Phyllis Goodhart Gordan and John Dozier Gordan = Mrs Phyllis Goodhart Gordan (POKk p.639: ‘most of the mss went to Bryn Mawr College Library, POKk p.322)**

**Gordan 110 xv (1465)**

Ad Her

**New York (U.S.A.)**

**Private Library of Phyllis Goodhart Gordan and John Dozier Gordan = Mrs Phyllis Goodhart Gordan (POKk p.639: ‘most of the mss went to Bryn Mawr College Library, POKk p.322)**

**Gordan 71-77 xv (1465)**

[Ad Her] inaug (Guarino da Verona; POK Iter V)

Check whereabouts and details

**New York (U.S.A.)**

**Pierpont Morgan Library**

**PML 35456.6 (ChL f468A) xv**

Ad Her

[Ad Her] s-gl

check in survey ch. 4(a)

# Nuremberg: see Nürnberg

**Nürnberg**

**Stadtbibliothek**

# Cent.V App.11 xv

Ad Her

[Ad Her] comm E (Philippus de Pistorio: ‘Viridarium super nova rethorica Tulliana editum et constructum a magistro Philippo de Pistorio notarialis facultatis et rethorice professore ac iurista et hic transsumptum per me L in 1368…’)

**Nürnberg**

**Stadtbibliothek**

**Sammlung Paer. Nachlass P(irckheimer) P(aper Hs) 298 xvi**

[De inv / Ad Her] extr / para / cn (a collection of notes on, extracts from these two texts, possibly from ‘cum sint…’, Fortunatianus, Victorinus etc.)

# Olmütz: see Olomouc

**Olomouc (Olmütz, in the former Czechoslovakia)**

**Státní Archiv**

**C.O.343 xv-xvi (c.1500)**

[Ad Her E] comm (f.2r: ‘Candiani Bolani philosophi ac oratoris Veneti primarii in rhetoricorum novorum Ciceronis librum primum commentum foeliciter incipit’)

**Olomouc (Olmütz, in the former Czechoslovakia)**

**Státní Vedecká Knihovna (formerly Universitní Knihovna)**

**M II 73 (1 VII 1 – I g 1) xv**

[Ad Her] acc

Ad Her

[Ad Her] mi/s-gl (f.98v: ‘explicit perutile et breve compendium artis rhetorice nove Marci Tulii Ciceronis per me Hainricum Moringher, scolarem Bononiensem’)

[Ad Her E] exord (Barzizza)

has f.1r picture of a *magister* lecturing, pointing his finger; f.56r has figure of a ‘queen’

**Olomouc (Olmütz, in the former Czechoslovakia)**

**Státní Vedecká Knihovna (formerly Universitní Knihovna)**

**M II 260 xv**

De inv

**Olomouc (Olmütz, in the former Czechoslovakia)**

**???????**

# 1320 A xvi

[Ad Her] comm E (‘ars rethorice sicut ceteris’; see Oxford Canon. Class. Lat 201-I; according to Dr Pumprla, who searched for me while at **Státní Vedecká Knihovna (formerly Universitní Knihovna)** in 1986, this MS is no longer to be found in this library, nor in **Státní Archiv** ???)

De inv

[De inv] mi-gl

**Oviedo (Asturias, Spain)**

**Biblioteca de la Catedral (Bibl. Capitular.)**

**21 xiv-xv**

Ad Her (ff.5ra-45va)

With *artes dictandi*.

**Oxford (U.K.)**

**Balliol College**

**132 xv**

[Ad Her E] comm (Gasparino Barzizza, on Ad Her IV 19-68)

**Oxford (U.K.)**

**Balliol College**

**248 E xv (c.1445)**

De inv

Ad Her

glossed?

**Oxford (U.K.)**

# Balliol College

**272 xii**

Ad Her

[Ad Her] s-gl

[Ad Her] ta-rhet

[Ad Her] cn

**Oxford (U.K.)**

# Balliol College

**273 xii**

De inv

**Oxford (U.K.)**

# Balliol College

**295 xv (1445)**

[Ad Her] comm incompl (Bartolinus ‘Justinianus Christianissimus…’)

**Oxford (U.K.)**

# Bodleian Library

# Auct. T.2.21 (SC 20,625) xi

[De inv] comm (Victorinus)

De inv extr (MO I p.326: the ‘Notes de Rhétorique’ fols 1v, 74v-76v are, in fact, extracts from Julius Victor, Halm *RLM* 440.12 *et seqq*, 444.35-445.4 etc; Jul. Severianus *Precepta artis rethoricae* is fols 70v-74v)

**Oxford (U.K.)**

# Bodleian Library

# Auct. F.5.15 (SC 2169) xii

De inv (MO I p.245: ‘Pas de gloses’)

Ad Her incompl (MO I p.245: ‘Pas de gloses’)

**Oxford (U.K.)**

# Bodleian Library

**Barlow 40 (SC 6480) xii** (cf. Lucca, Biblioteca Statale (formerly Biblioteca Governativa), 1405 xii on the miniature: MO I pp.245-46 ‘qui représente Cicéron (‘Cicero’), au centre, en tenue de consul, écoutant les arguments de Caton d’Utique (‘Cato’) et de César (‘Cesar’) avant de décider du sort de Catilina et de ses conjurés; inscriptions en partie sur des phylactères et sur un livre que tient à la main de Cicéron (‘ad mortem Catilina duci …’; cf. *Catil.* 1.1.2; for fuller nn see my nn in FC)

De inv

[De inv] s-gl

get copy of miniature; annotations in several English xv hands (information from Albinia de la Mare, 5/11/86). Adjust survey in ch. 4(a).

**Oxford (U.K.)**

# Bodleian Library

**Bodley 552 (SC 2304) xiii**

[Ad Her E] ex (Marbod)

**Oxford (U.K.)**

# Bodleian Library

**Bodley 633-II xii**

Ad Her extr (M-O I p.246; II p.858)

**Oxford (U.K.)**

# Bodleian Library

# Canon. class.lat. 201-I (SC 18,782) xii

[De inv] comm E (‘ars rethorice sicut et cetere artes…’; MO I p.326)

**Oxford (U.K.)**

# Bodleian Library

# Canon. class. lat. 201-II (SC 18,782) xii

De inv

[De inv] s-gl

‘ex-libris of Venetian humanist Leonardo Giustiniani; annotations probably by him’. Information from Albinia de la Mare, 5/11/86). Adjust survey in ch. 4(a

**Oxford (U.K.)**

# Bodleian Library

# Canon. class. lat. 204 (SC 18,785) xv

Ad Her

[Ad Her] mi/s-gl (extensive on fols 1-5, conservative, reflecting pre-Guarino teaching of Alanus and the commentators dependent upon him…)

De inv

[De inv] s-gl

Italy, first half of xv. Information from Albinia de la Mare, 5/11/86). Adjust survey in ch. 4(a).

**Oxford (U.K.)**

# Bodleian Library

# Canon. class. lat. 207 (SC 18,788) xv

De inv

Bolognese MS from mid xv (Albinia de la Mare, 3/12/86)

Xzx MH

**Oxford (U.K.)**

# Bodleian Library

# Canon. class. lat. 208 (SC 18,789) xv

Ad Her (with Isidore *Et*. II – Halm *RLM* XV p.507 [also found, acc. to IRHT in MSS Cambrai 940 f.5, Valenciennes 404 f.9, London BL Roy.10.B.IX f.46v, Berne 520 f. 153]; called in Diss II p.568 [M41] ‘epitome of De inv’)

check

**Oxford (U.K.)**

# Bodleian Library

**Canon. class. lat. 216 xv**

Ad Her

SC number? Alessio only

**Oxford (U.K.)**

# Bodleian Library

# Canon. class. lat. 228 xv

Ad Her

Also contains Boethius *De differentiis topicis* IV. Coxe *Cat. Cod. Manuscriptorum* 1854 p.208.

**Oxford (U.K.)**

# Bodleian Library

# Canon. class. lat. 232 xv

Ad Her

**Oxford (U.K.)**

# Bodleian Library

# Canon. class. lat. 234 xv

Ad Her

[Ad Her] mi/s-gl

**Oxford (U.K.)**

# Bodleian Library

# Canon. class. lat. 240 xv (1453)

Ad Her

Check. Alessio only

**Oxford (U.K.)**

# Bodleian Library

**Canon. class. lat. 242 xv**

Ad Her

Check. Alessio only

**Oxford (U.K.)**

# Bodleian Library

**Canon. class. lat. 249 xv**

Ad Her

Check. Alessio only

**Oxford (U.K.)**

# Bodleian Library

**Canon. misc. 7 (SC 19,483) xv (1435-54)**

[Ad Her] cn (‘Michael Scottus ex auctoritate Ciceronis dicit ars est collectio preceptorum ad unum finem tendentium sed precepta rethorice…’)

[Ad Her] comm E

**Oxford (U.K.)**

# Bodleian Library

**Canon. misc. 12 (SC ) xv (?)**

[Ad Her E] exord (Barzizza)

Add SC number

**Oxford (U.K.)**

# Bodleian Library

**Canon. misc. 165 (SC 19,641) xv**

[Ad Her] comm (Guarino da Verona)

[Ad Her E] exord (Barzizza)

[Ad Her E] comm (Gasparino Barzizza)

**Oxford (U.K.)**

# Bodleian Library

**Digby 15 xv**

[Ad Her] abr (Murphy *Rhet. in the MA* p.115 n.85 ‘presents a rapid summary of *Ad Herennium* in only eight small quarto pages, fols 129-33)

**Oxford (U.K.)**

# Bodleian Library

**Digby 37-IV (SC 1638) xii**

Ad Her

[Ad Her] s-gl (**xii-xiii**)

[Ad Her] acc (**xii-xiii**, ‘ut ait Victorinus duplex traditur ars intrinsecus ….’ = Alanus?)

**Oxford (U.K.)**

# Bodleian Library

**Digby 53 (SC 1654) xii**

Ad Her extr

[Ad Her E] ex (Marbod)

**Oxford (U.K.)**

# Bodleian Library

**Digby 100 (SC 1701) xiv**

[Ad Her E] ex (Marbod)

**Oxford (U.K.)**

# Bodleian Library

**D’Orville 10 (Auct. X.1.1.10; SC 16,888) xv**

De inv E

[De inv E] m-gl

Ad Her

[Ad Her] s-gl

check assignment in survey ch. 4(a); ‘Written by several cursive hands. Italy, xv mid (?)’. Information from Albinia de la Mare 5/11/86.

**Oxford (U.K.)**

# Bodleian Library

**D’Orville 80 (Auct. X.1.3.21; SC 16,958) xv**

Ad Her

**Oxford (U.K.)**

# Bodleian Library

**D’Orville 81 (Auct. X.1.3.22; SC 16,959) xv (Venetian, c.1420-40)**

De inv

Glossed? Venetian, c. 1420-40 (Albinia de la Mare, 5/11/86)

**Oxford (U.K.)**

# Bodleian Library

**D’Orville 134 (Auct. X.1.4.32; SC 17,012) xv**

Ad Her E

[Ad Her E] s-gl

**Oxford (U.K.)**

# Bodleian Library

**D’Orville 152 (Auct. X.1.5.5; SC 17,030) xv-xvi (c.1500)**

[De inv] comm (‘Donatus’ – in fact Victorinus)

[De inv] comm E (anon, *cum sint undecim adtributa*)

[De inv] comm E (‘Victorinus’; in fact = Grillius, *incipientes quamcumque rem)*

**Oxford (U.K.)**

**Bodleian Library**

**Lat. class. d.26 xv (1468)**

Ad Her

[Ad Her] s-gl

**Oxford (U.K.)**

**Bodleian Library**

**Lat. class. d.36 xiv**

[Ad Her] comm incompl (‘plena et perfecta locutio triplici comparatur…’)

**Oxford (U.K.)**

**Bodleian Library**

**Lat. misc. F.49 xiv**

[Ad Her] para incompl (???)

check; I am advised by the Librarian Martin Kauffmann that the MS was acquired in 1961, and is not found in the *Summary Catalogue*; single column, rubrics in red and flourished initials; xiv, French.

**Oxford (U.K.)**

**Bodleian Library**

**Laud. lat. 49-I (SC 1143) xi**

De inv

[De inv] m-gl (‘primum in hoc libro notandum quod quicumque incipit orationem tria adhibere debet, ut auditorem faciat attentum …’ = Victorinus Halm *RLM* p.15, and in fact the whole gloss is heavily dependent upon Victorinus)

[De inv] comm E (Victorinus)

[De inv] comm E (‘cum sint…’)

**Oxford (U.K.)**

**Bodleian Library**

**Laud. lat. 61 (SC 928) xv**

Ad Her

Check; has Traversagni *Rhetorica Nova* (incomplete; see Weiss (1967); Traversagni composed a letter-wruting manual at Vienna (the *Modus epistolandi*) that went rhrough 11 separate editions 1478-98; in 1460 he was at Toulouse lecturing on rhetoric and moral philosophy. In 1478 he composed a *Margarita eloquentiae sive rhetorica nova*. Sometime in the 1480’s or 1490’s an unknown copyist transcribed at least two thirds of the St. Albans Manusccript of this work, which has survived as Bodleian Laud. Lat.61, the present manuscript. Information from Jerry Murphy in a paper kimdly made available to me entitled ‘Laurentius Guglielmus Traversagnus and the genesis of Vatican codex Lat. 11441, with remarks on Bodleian MS Laud Lat. 61’. Murpnhy writes, in this paper, ‘The *Margarita* is an important book in the history of rhetoric: it is the first full rhetoric text printed in England, it is the first to apply the Pseudo-Ciceronian *Rhetorica ad Herennium* to modern preaching (breaking with the medieval tradition going back five centuries), and the first to urge classical studies for use in government and diplomacy’. See Green (1986). Murphy cites Malcolm Parkes on this MS (in a personal letter). The MS is written in a single hand, a secretary hand of the last quarter of the fifteenth century; the scribe seems to have followed the *Ad Her*. with what he thought was a commentary on this work ‘the most commented-upon book in the whole corpus of medieval and early modern rhetoric’. In fact, of course, Traversagni was heavily dependent upon the *Ad Her*. ‘throughout his treatment of rthetoric in the book’. See also below MS Vat. Lat. 11441.

**Bodleian Library**

**Laud. lat. 64 (SC 1040) xv**

Ad Her

check

**Oxford (U.K.)**

**Bodleian Library**

**Laud. misc. 363 (SC 1385) xii**

[Ad Her E] ex (Marbod)

check assignment in survey ch. 4(a)

**Oxford (U.K.)**

**Bodleian Library**

# Rawlinson G.30 (SC 14,762) xv

Ad Her

**Oxford (U.K.)**

**Bodleian Library**

**Rawlinson G.34 (SC 14,765) xii** (IRHT; ‘S.C. says 13th century, but I would say twelfth’ – ep. from Albinia de la Mare 5/11/’86)

De inv

[De inv] s-gl (‘there are later notes in English hands’ - – ep. from Albinia de la Mare 5/11/’86)

check

**Oxford (U.K.)**

**Bodleian Library**

**Rawlinson G.36 (SC 14,767) xiii-xiv (c.1400)**

De inv

[De inv] s-gl

Ad Her

[Ad Her] m/mi-gl (‘quoniam in principio cuiusque operis libri generales cause requiruntur…’

Italy, probably Florence, late xiv or early xv. The MS was purchased by an unknown owner from a Florentine *Librarius* called Franciscus in 1440, and was owned later in the fifteenth century by Gaspare Zacchi of Volterra, bishop of Osimo (1425-74). Information from Albinia de la Mare 5/11/’86.

**Oxford (U.K.)**

**Corpus Christi College (MSS now reclaimed from Bodley)**

**59 xiii**

Ad Her extr

[Ad Her E] ex (Marbod)

**Oxford (U.K.)**

**Corpus Christi College (MSS now reclaimed from Bodley)**

**219 (E) xv (1476-84)**

Ad Her

[Ad Her] m-gl (‘incipit liber rethoricorum Marci Tulii Ciceronis Arpinatis de vili genere propagati grece pericie et latine eloquencie…’)

**Oxford (U.K.)**

**Corpus Christi College (MSS now reclaimed from Bodley)**

**250 (D) xiii**

[Ad Her] comm E (‘Ut ait Quintilianus …’)

**Oxford (U.K.)**

**Lincoln College**

**lat. 84 xv-xvi** (seen on deposit in Bodley)

Ad Her

[Ad Her] s-gl

[Ad Her] comm E (Guarino da Verona)

**Oxford (U.K.)**

**Lincoln College**

**lat. 27 xii**

Ad Her extr

[Ad Her E] ex (Marbod)

**Oxford (U.K.)**

**Magdalen College (seen on deposit in Bodley)**

**82 xv**

[Ad Her] comm incompl (Alanus)

**Oxford** ‘inter addicios’ 67, 22 (olim 748) xii De inv; Mattmann p.178; CMN p.4. Not included as unascertainable

Bruce Barker-Benfield has kindly written to me from the Bodleian to say that the Bodleian copy of Mattmann has pencilled against this ‘wrong ref?’ and Barker-Benfield concurs with this, adding that Mattmann has clearly obtained the reference from some secondary source, but has failed to check it. Barker-Benfield has made further efforts to locate a MS , without positive result, notes that Mattmann has failed to identify which library is involved.

**Padova**

**Biblioteca Antoninana**

**Scaff I.11 xv**

Ad Her

[Ad Her] s-gl

**Padova**

**Biblioteca Antoninana**

**Scaff I.18 xiv-xv (c.1400)**

Ad Her incompl

[Ad Her] s-gl

**Padova**

**Biblioteca Antoninana**

**Scaff XXIII 611 xvi**

[Ad Her] trans ital*

**Padova**

**Biblioteca Capitolare**

**B.39 xiv**

Ad Her incompl

[Ad Her incompl] s-gl

**Padova**

**Biblioteca Capitolare**

**B.43 xv**

Ad Her

[Ad Her] s-gl

**Padova**

**Biblioteca Universitaria**

**1261 xv (formerly Bibl. di S. Michele di Murano 357)**

[Ad Her] abr (‘summarium rhetoricae novae’; written by one Bonifacio)

check

**Padova**

**Biblioteca Universitaria**

**1409 xv**

[De inv] comm (Victorinus

[De inv] comm E (‘cum sint…’)

# Padua: see Padova

**Palermo**

**Biblioteca comunale**

**2Qq D 140 xv**

[Ad Her] comm E (on Ad Her 1: Guarino da Verona)

[Ad Her] comm E (on Ad Her 4.19 to end)

[Ad Her] comm E (on Ad Her 3.31.50)

**Paris**

**Bibliothèque de l’Arsenal**

**711 xiii**

De inv extr (part of this MS [fol.247 no.14] is ‘heute Hamburg, Cod.53c in scrin.’ IRHT)

Check; on fols 182 and following occur extracts from Quintilian; extracts from Cicero follow on fols 190 *et seqq*. (rhetorical extracts on f.190.

**Paris**

**Bibliothèque de l’Arsenal**

**884 (20 B.L.) xv**

De inv

[De inv] s-gl

Ad Her

**Paris**

**Bibliothèque de l’Arsenal**

**943 xv** (Manuscrits de L’Abbaye de Saint-Victor, 2 p.525)

De inv

**Paris**

**Bibliothèque de l’Arsenal**

**1133 (22 B.L.) xv**

Ad Her, fols 1r-154v

Dr L.S.Davidson reports that there are no glosses at all, but a beautiful ornamented first page with decoration filling the margin and a portrait of a bearded man reading; there are illuminated initials for book beginnings, and red chapter headings etc.

**Paris**

**Bibliothèque de l’Arsenal**

**1144 (69 B.L.) xv**

[Ad Her] cn (contains fols 112-124v and probably to 128v, with cross-outs, blank pages and spaces, in an irregular, personal cursive, notes of a text [of the *Ad Her*] or from a lecture series [on that text], including sample letters and *exordia’*

**Paris**

**Bibliothèque de l’Arsenal**

**1155 ( ) xv**

Ad Her (154 fols ? Gallick p.92)

Possibly a mistake. Delete?

**Paris**

**Bibliothèque Nationale**

**Lat. 2335-IV xi**

De inv E

[De inv E] mi-gl

**Paris**

**Bibliothèque Nationale**

**Lat. 2335-V xii-xiii**

Ad Her

[Ad Her] s-gl

**Paris**

**Bibliothèque Nationale**

**Lat. 2450 xi**

[De inv] comm E (‘si tam agentis…’)

**Paris**

**Bibliothèque Nationale**

**Lat. 2904-IX xii-xiii**

De inv E (M-O III.2 p.41

**Paris**

**Bibliothèque Nationale**

**Lat. 3761 xii-xiii**

[Ad Her] ex E (Marbod)

**Paris**

**Bibliothèque Nationale**

**Lat. 6362 xv**

Ad Her

**Paris**

**Bibliothèque Nationale**

**Lat. 6380 xii**

Ad Her extr

[Ad Her] ex E (Marbod)

**Paris**

**Bibliothèque Nationale**

**Lat. 7231-II xi**

[Ad Her] ta

Ad Her incompl

[Ad Her incompl] s-gl [MO I p.260: ‘quelques gloses en notes tironiennes’)

**Paris**

**Bibliothèque Nationale**

**Lat. 7647-II xii-xiii** (MO I p.261; II p. 861; IRHT)

De inv extr

Ad Her extr

**Paris**

**Bibliothèque Nationale**

**Lat. 7695 xiv**

De inv

Ad Her

[De inv] comm E (Grillius)

**Paris**

**Bibliothèque Nationale**

**Lat. 7696-I xi**

De inv

[De inv] mi/s-gl

**Paris**

**Bibliothèque Nationale**

**Lat. 7696-II xi**

[De inv] comm (Victorinus)

[De inv] comm E (‘cum sint…’)

Ad Her

[Ad Her] s-gl (**xi-xii**)

**Paris**

**Bibliothèque Nationale**

**Lat. 7697 xi**

De inv (fols 1r-52v)

[De inv] mi-gl (?MO I p.263: Gloses marginales; index marginal, tableaux marginaux’)

Dr L.S.Davidson reports that the text is in long lines, with two green initials. There is moderate interlinear and marginal glossing throughout, with tables and indices in the margins. Dr Davidson writes ‘If one regards the tables and indexing as glossing, I would be inclined to indicate ‘medium glossing’, additionally because the interlinear glossing continues throughout, though varying in intensity’. The glossing / indexing seems to be contemporary, in a hand that is smaller but similar to that of the text.

**Paris**

**Bibliothèque Nationale**

**Lat. 7698 xiv**

De inv (fols 2r-26v)

Ad Her (ends f.54v)

Dr L.S.Davidson indicates that neither text is glossed. The MS has other works of Cicero iand Seneca n it. There are xv interpolations.

**Paris**

**Bibliothèque Nationale**

**Lat. 7699 xiii** (F.Avril and Y.Zaluska *Manuscrits Enluminés d’Origine Italienne* II pp.179-80: ‘2 initiales histories, fols 1 and 1v: Cicero en buste’ [dressed in cape with ermine collar and small flat cap = ‘magister’?])

De inv

Ad Her

order copies of illustrations

**Paris**

**Bibliothèque Nationale**

**Lat. 7700 xv Is this another number by chance or is the next item a repeat?**

De inv (ff.1r-79r)

Ad Her (ff.79r-154r)

Plain red initials, no glossing (information from Dr. L.S.Davidson)

**Paris**

**Bibliothèque Nationale**

**Lat. 7700 xv (1461)**

De inv

Ad Her

**Paris**

**Bibliothèque Nationale**

**Lat. 7714 ix**

Ad Her incompl (with lacunae added **xii**; has essentially the same rubrics as BN lat. 7231)

[Ad Her incompl] s-gl (and **xiv-xv**)

**Paris**

**Bibliothèque Nationale**

**Lat. 7715 xiv**

De inv

Ad Her

**Paris**

**Bibliothèque Nationale**

**Lat. 7716 xv (1466)**

Ad Her

[Ad Her] s-gl (in other hh)

**Paris**

**Bibliothèque Nationale**

**Lat. 7717 xv**

Ad Her

[Ad Her]

with m/sgl: update survey in ch. 4(a)

**Paris:**

**Bibliothèque Nationale**

**Lat. 7718 xv**

[Ad Her] acc

Ad Her

Ad Her] s-gl (‘ista retorica est mei Iohannis Andria secretarii…quam emi civitate mediolanensi die mensis penultima maii 1436…’)

**Paris**

**Bibliothèque Nationale**

**Lat. 7718A xv**

Ad Her

**Paris**

**Bibliothèque Nationale**

**Lat. 7737 xi**

De inv

[De inv] mi-gl

**Paris**

**Bibliothèque Nationale**

**Lat. 7737-FDG(d) xii**

De inv E

**Paris**

**Bibliothèque Nationale**

**Lat. 7738 xii**

De inv

[De inv] s-gl

Ad Her

[Ad Her] s-gl (slightly more glossing than for the De inv)

**Paris**

**Bibliothèque Nationale**

**Lat. 7739 xii**

De inv

[De inv] s-gl

Ad Her

[Ad Her] s-gl

**Paris**

**Bibliothèque Nationale**

**Lat. 7740 xii**

De inv

[De inv] s-gl

Ad Her

[Ad Her] s-gl (slightly less glossing than for the De inv)

get copy of illustration on f.1r, a curious miniature in which Plato and another are engaged in a debate on the nature of rhetoric.

**Paris**

**Bibliothèque Nationale**

**Lat. 7741 xii**

De inv

[De inv] s-gl

Ad Her

[Ad Her] s-gl

**Paris**

**Bibliothèque Nationale**

**Lat. 7742 xii**

[De inv] comm E (**xii-xiii**, on De inv 1.42? Cf. Victorinus, Thierry of Chartres and Petrus Helias ad loc)

De inv

[De inv] s-gl

Ad Her

[Ad Her] s-gl

**Paris**

**Bibliothèque Nationale**

**Lat. 7743 xii (-xiii?)** (MO III.2 p.41 gives ‘xii ex’, Leotta, for the Marbod, gives s.xiii [twice??]; IRHT ‘xiii’)

[De inv / Ad Her] cn (**xiv-xv**, with frg of notarial acts: fol.I)

De inv (fols 1v-72r)

[De inv] s-gl (and **xv**)

Ad Her (ff.73r-140v)

[Ad Her] s-gl (**xv)**

Ad Her extr (= the definitions illustrated by Marbod’s examples; IRHT indicates these are in the MS; Leotta’s entries are confusing, and possibly inaccurate?)

[Ad Her] ex E (Marbod)

Dr L.S.Davidson indicates that there is no glossing on the *De inv*. There is a large ornamented ‘S’ on f.1v. The *Ad Her.* has a moderate interlinear and a slight marginal gloss. The Marbod is in a somewhat different hand to the rhetorical texts and may be a later addition?

**Paris**

**Bibliothèque Nationale**

**Lat. 7744 xii** (IRHT says xi)

De inv

[De inv] s-gl (mentioning ‘Quintilianus’ on the ‘constitutiones legales’ and **xiv-xv** headings)

Ad Her

[Ad Her] s-gl (**xiv-xv** headings)

**Paris**

**Bibliothèque Nationale**

**Lat. 7745 xii**

De inv

[De inv] s-gl (**xii-xiii**)

Ad Her

[Ad Her] s-gl (**xii-xiii**)

**Paris**

**Bibliothèque Nationale**

**Lat. 7746 xv**

De inv

Ad Her

[Ad Her] s-gl

[De inv] comm E (‘si tam agentis …’)

[Ad Her] ex E (Marbod)

**Paris**

**Bibliothèque Nationale**

**Lat. 7747 xv**

De inv

[De inv] s-gl

**Paris**

**Bibliothèque Nationale**

**Lat. 7748 x** (cf. BN lat. 7696; MO I p.327 gives the date as ‘Bischoff’)

De inv incompl tca

[De inv] comm incompl tca (Victorinus)

[De inv] mi-gl

[De inv] comm E (to complete tenth-century portions of Victorinus; **xiii-xiv**; 2 hh, one that of Petrarch)

[De inv] comm E (‘cum sint.. .’ to Halm RLM 306.23 ‘diligentia’; **xiii-xiv**; 2 hh, one that of Petrarch)

**Paris**

**Bibliothèque Nationale**

**Lat. 7749 ix**  (Loire region; MS belonged to Richard de Fournival and is no.36 in his *Biblionomia* [see Rouse ‘MSS belonging to Richard de Fournival’ *RHT* 3 (1973) pp.256 and 260, plate xxii]. The Victorinus text [28 very neat lines per page] forms the principal text on each page, but the text of the *De inv* is found in larger script as a marginal gloss occupying the outer margin of each folio [in red, with black for fols 53-55] and frequently also the top and bottom margins. From *De inv* 2.15.16 [Stroebel 82b.21 *controversiam*] onwards, the scribe has stopped writing in the text of the *De inv* [fol.57v]. The Victorinus text has some textual variants written by the scribe suprascript with insertion in the inner margins of passages ommitted from the text, by haplography etc. [e.g. fols 4r, 9v, 21v, 62v]. There are also in the left hand margin of the right hand page headings and key words [some in green] with one or two notes in later hh in the inner margins. In the red text of the *De inv* there are occasional short IL comments in black ink, summarising, paraphrasing, making the meaning explicit, etc. The text of Victorinus has more tables than in the Halm *RLM* edition. *De adtributis* follows, fols 77v-80. Fol 80v contains miscellaneous notes on the *artes* mentioning ‘*Priscianus maior, Virgilius cum Servio, Oratius, Beda de temporibus, Persius, Boethius de Trinitate, Martianus,* *abbreviatio compoti*, *Ysagogas, Categorias, Perihermenias, Topica,* Calchidius, Cicero *de rhetorica*, Cicero *de partibus oratoriae*, Victorinus’ and other remarks – a contemporary basic programme in the arts, designed as an introduction to the classical / late classical text and commentary? MO I p.268)

[De inv] comm tC (ix, 3rd quarter [Bischoff in a letter to me dated 1975]; Victorinus)

De inv incompl tC (x – Bischoff in a letter to me dated 1975)

[De inv E / comm] s-gl

[De inv] comm E (‘cum sint…’)

**Paris**

**Bibliothèque Nationale**

**Lat. 7754 xv**

Ad Her

[Ad Her] s-gl

**Paris**

**Bibliothèque Nationale**

**Lat. 7755 xv (1466)**

Ad Her

**Paris**

**Bibliothèque Nationale**

**Lat. 7756 xv**

Ad Her (ff.1r-107v)

[Ad Her] s-gl (? Old Cat. IV p.390: ‘ad calcem subjiciuntur anonymi observationes grammaticae et rhetoricae’)

Dr L.S.Davidson indicates that there are interlinear glosses and heavy marginal glossing. The text ends one third the way down f.36v and the rest of the folio is glossing; she describes the glossing on the *Ad Her.* as ‘heavy’. Adjust the survey in ch. 4(a).

**Paris**

**Bibliothèque Nationale**

**Lat. 7756A xvi-xvii**

[Ad Her] comm (fols 8-174v: ‘animadversiones in quatuor rhetoricorum libros ad Caium Herennium’, inc. ‘[etsi] laudatam non philosophorum modo’; cf. fols 1-7 ‘oratio de Sancti Johannis Baptistae decollatione habita in aula regia collegii Romani [Collegio Romano, Jesuit college in Rome, founded 1551] Societatis Jesu anno Jubilaei 1600’

**Paris**

**Bibliothèque Nationale**

**Lat. 7757 xv**

[Ad Her] comm (Alanus)

**Paris**

**Bibliothèque Nationale**

**Lat. 7765 xi**

De inv

[De inv] m-gl (Victorinus ‘horum si unum desit non ostendit’, Halm *RLM* 156.31; contains marginalia in Beneventan fols 36 and 44v: V.Brown ‘A second new list of Beneventan manuscripts’ *Mediaeval Studies* 40 [1978] p.267)

**Paris**

**Bibliothèque Nationale**

**Lat. 7767 xv (1463)**

Ad Her

**Paris**

**Bibliothèque Nationale**

**Lat. xv (1473-74)**

Ad Her

**Paris**

**Bibliothèque Nationale**

**Lat. 7769 xv**

Ad Her

**Paris**

**Bibliothèque Nationale**

**Lat. 7774A-II ix**

De inv (This MS, the oldest extant copy of the *De inventione*, seems to have been written, originally, at Tours c.820-25, with several lacuna; see my nn in FC 2 for full history of MS and its annotations)

[De inv] s-gl (partly in the hand of Lupus [Loup] of Ferrières)

[De inv] mi/sgl (**xi-xii**)

**Paris**

**Bibliothèque Nationale**

**Lat. 8048 and Lat. 15139-II (MO I p.271; Reeve in Menestó p.123) xii**

Ad Her extr

[Ad Her extr] s-gl (MO I p.271: ‘Quelques rares gloses marginales; *Nota* marginaux’; xii and some xiv**)**

**Paris**

**Bibliothèque Nationale**

**Lat. 8089 xv**

De inv / Ad Her extr (??? – florilegium? See ON 86/5/2 and 4/81)

Dr L.S.Davidson reports that the MS has works by Prudentius, Claudian, Cicero, Vergil, Statius, Boethius, Quintilian (*Institutes*), Seneca, Sidonius. There are no glosses; the work is a florilegium ‘presumably with an extract from the *Ad Herennium’*.

**Paris**

**Bibliothèque Nationale**

**Lat. 8214 xi**

Ad Her extr (from bk I)

[Ad Her] ta

**Paris**

**Bibliothèque Nationale**

**Lat. 8499 xii**

Ad Her extr (??? Leotta: xxxix: ‘le definizioni in prosa sono del tutto diverse’; my own inspection indicates that the prose definitions are highly abridged and paraphrased, using quite different words, from the *Ad Her* itself)

[Ad Her] ex E (Marbod)

**Paris**

**Bibliothèque Nationale**

**Lat. 9539 ix**

De inv extr (MO I p.272 = on the virtues)

**Paris**

**Bibliothèque Nationale**

**Lat. 11,138 xv**

[Ad Her E] exord (Barzizza)

**Paris**

**Bibliothèque Nationale**

**Lat. 11,287 xii**

Ad Her E

[Ad Her E] s-gl (**xii-xiv**)

De inv

[De inv] s-gl (**xii-xiv**)

[Ad Her] comm E (a nine line, variant fragment from the twelfth-century Ad Her gloss ‘Etsi cum Tullius’ [by Willam of Champeaux?]; a later hand has added ‘hoc non est de textu’, i.e not from the Ad Herennium, which follows in the MS)

Ad Her E

[Ad Her E] s-gl (**xii-xiv**)

**Paris**

**Bibliothèque Nationale**

**Lat. 11,297 xviii**

[De inv / Ad Her *et al*] abr (? ‘Rhetorica ex Aristotele, Tullio et Fabio contracta’)

**Paris**

**Bibliothèque Nationale**

**Lat. 12,958 ix-x**

[De inv] comm E (Grillius, though MS says, in the margin, ‘ex libro Boetii super Topica M.Tullii Ciceronis’)

**Paris**

**Bibliothèque Nationale**

**Lat. 14,116-II xi** (with Boethius *De diff. Top*. IV)

De inv (fols 9r-124r)

[De inv] mi-gl (MO I p.274 ‘Nombreuses gloses interlinéaires et marginales’)

Contains Isidore ‘rhetorica’ (ff.1v-8v) and Boetgius *De differentiis topicis* IV. The *De inv*. has heavy interlinear and marginal glossing, at times filling the margins, in an approximately contemporary hand. There are also a few diagrams. Information from Dr L.S.Davidson.

**Paris**

**Bibliothèque Nationale**

**Lat. 14,175 xv (1454)**

[De inv / Ad Her *et al*] para (?’ars rhetorica e Tullio, Horatio, Dalphino Boncompagno et Johanne Lemovicensi’: ‘…huius operis auctor, id est ligator, unicus fuit, auctores autem plurimi inter quos principales famosus et clarus rethor Tullius, egregius et numerosos Horacius, Dalphinus dictus Bonecompainge qui magnam decretalium partem dictavit, necnon et summus omnium dictatorum omnium [sic] Lemovicensis Johannes… … explicit singulare opus et utile artis rethorice ex dictis rethorum conpilatum ….’)

**Paris**

**Bibliothèque Nationale**

**Lat. 14,716 xv**

[Ad Her] comm E (on 1.4.4 to 2.29.46 ‘*benivolos auditores quattuor modis* [Ad Her 1.1.4.8] hic tangitur quomodo per orationem benivolentia causetur in animo auditorum, designando primo fundamenta principalia a quibus …’; see Allen *Ethical Poetic* pp.19 and 59)

**Paris**

**Bibliothèque Nationale**

**Lat. 14,751 xi**

[De inv] comm (Victorinus)

[De inv comm] s-gl

[De inv] comm E (‘cum sint…’)

[De inv / Ad Her] ta-rhet (**xi-xii**; MO I p.328; my nn: ‘*De adtributis* follows f.68v-71, with a table of *civilis scientia* on f.71r in the midst of which we find ‘hae figure sunt secundum Victorinum’. There are occasional contemporary corrections, marginal tables and headings throughout, but most frequent on the early folios’; *Manuscrits de L’Abbaye de Saint-Victor* 2 p.524)

**Paris**

**Bibliothèque Nationale**

**Lat. 15,086-I xii**

[De inv] comm E (Grillius; MO I p.328)

**Paris**

**Bibliothèque Nationale**

**Lat. 15139-II: see Lat. 8048**

**Paris**

**Bibliothèque Nationale**

**Lat. 15,140 xii** (MO I p.275; *Manuscrits de L’Abbaye de Saint-Victor* 2 p.524)

De inv

[De inv] s-gl

Ad Her

[Ad Her] s-gl

[De inv] comm E (‘si tam agentis…’)

Ad Her extr (??)

[Ad Her] ex E (Marbod)

check whether Marbod has prose definitions – not in Leotta? Dr L.S.Davidson reports that the MS does not seem to have the prose definitions.

**Paris**

**Bibliothèque Nationale**

**Lat. 15,141-II xii (***Manuscrits de L’Abbaye de Saint-Victor* 2 p.590)

De inv

[De inv] s-gl (**xiii**?)

Ad Her

[Ad Her] s-gl (**xiii**?)

**Paris**

**Bibliothèque Nationale**

**Lat. 15,685-II xii**

De inv E

[De inv E] s-gl

**Paris**

**Bibliothèque Nationale**

**Lat. 16,669 xv**

Ad Her

**Paris**

**Bibliothèque Nationale**

**Lat. 16,675 xii** (MO I pp.276-77 ‘Pas de gloses’)

De inv

Ad Her

**Paris**

**Bibliothèque Nationale**

**Lat. 16,679**

Not included in ch. 4(a). Not relevant: contains a heavily glossed twelfth century copy of Macrobius’ commentary on the *Somnium Scipionis.*

**Paris**

**Bibliothèque Nationale**

**Lat. 17,154 xiv**

Ad Her

De inv (following which, without a break, is a note: ‘omnis comparatio aut in numero constat aut in specie aut in vi aut in aliqua locata extrinsecus affectione…’)

**Paris**

**Bibliothèque Nationale**

**Lat. 17,161 xii**

Ad Her extr

[Ad Her extr] ex E (Marbod)

**Paris**

**Bibliothèque Nationale**

**Lat. 17,884 xi**

De inv

De inv E cta (as far as 1.52.99, Stroebel 69b line 26)

[De inv E] comm cta (Victorinus, extending to Halm *RLM* p.255 bottom) **Abbrev cta doesn’t seem to be in master list at intro? Check. = commentary / text alternating, tca?**

**Paris**

**Bibliothèque Nationale**

**Lat. 17,885 xv (1456)**

Ad Her

**Paris**

**Bibliothèque Nationale**

**Lat. 18,525-I xii** (MO I p.280 ‘Pas de gloses’)

De inv E

Ad Her E

**Paris**

**Bibliothèque Nationale**

**Lat. 18,570 xiv**

[Ad Her extr] ex E (Marbod)

**Paris**

**Bibliothèque Nationale**

**Nouv.acq.fr. 4194 xvii**

De inv[ trans. fren*

**Paris**

**Bibliothèque Nationale**

**Nouv.acq.lat. 340-II xi** (MO I p.328)

[De inv] comm E (Grillius)

**Paris**

**Bibliothèque Nationale**

**Nouv.acq.lat. 900 xv**

Ad Her

[Ad Her] cn (‘figure locucionis…’)

**Paris**

**Bibliothèque Nationale**

**Nouv.acq.lat. 1671 xv**

Ad Her E (ON ‘86/4/55-56)

**Paris**

**Bibliothèque Nationale**

**Nouv.acq.lat. 2243-VII xii**

De inv E (MO I p.281 ‘Pas de gloses’)

**Paris**

**Bibliothèque de l’Université de Paris**

**1491 xvi**

[De inv] abr (‘Epitome librorum [Ciceronis] de inventione’)
